# Supplementary material for: Synthesis of molybdenum nanoclusters from Vitex negundo leaves for sensing epinephrine in a pharmaceutical composition
Source: Royal Society of Chemistry journal article supplement (doi:10.1039/d3sd00063j), 2023-01-01
Supplement: d3sd00063j1.pdf [file d3sd00063j1.pdf]

## Supporting Information of

### Synthesis of molybdenum nanoclusters from *Vitex negundo* leaves for sensing of epinephrine in pharmaceutical composition

**Harshita<sup>a</sup>, Sanjay Jha<sup>b</sup>, Tae-Jung Park<sup>c</sup> and Suresh Kumar Kailasa<sup>a\*</sup>**

<sup>a</sup>*Department of Chemistry, Sardar Vallabhbhai National Institute of Technology, Surat-395 007, India*

<sup>b</sup>*ASPEE Shakilam Biotechnology Institute, Navsari Agricultural University, Surat 39500, Gujarat, India*

<sup>c</sup>*Department of Chemistry, Research Institute of Chem-Bio Diagnostic Technology, Chung-Ang University, 84 Heukseok-ro, Dongjak-gu, Seoul 06974, Republic of Korea*

*E-mail: sureshkumarchem@gmail.com; skk@chem.svnit.ac.in*

*\* Corresponding author, Phone: +91-261-2201730; ax: +91-261-2227334*

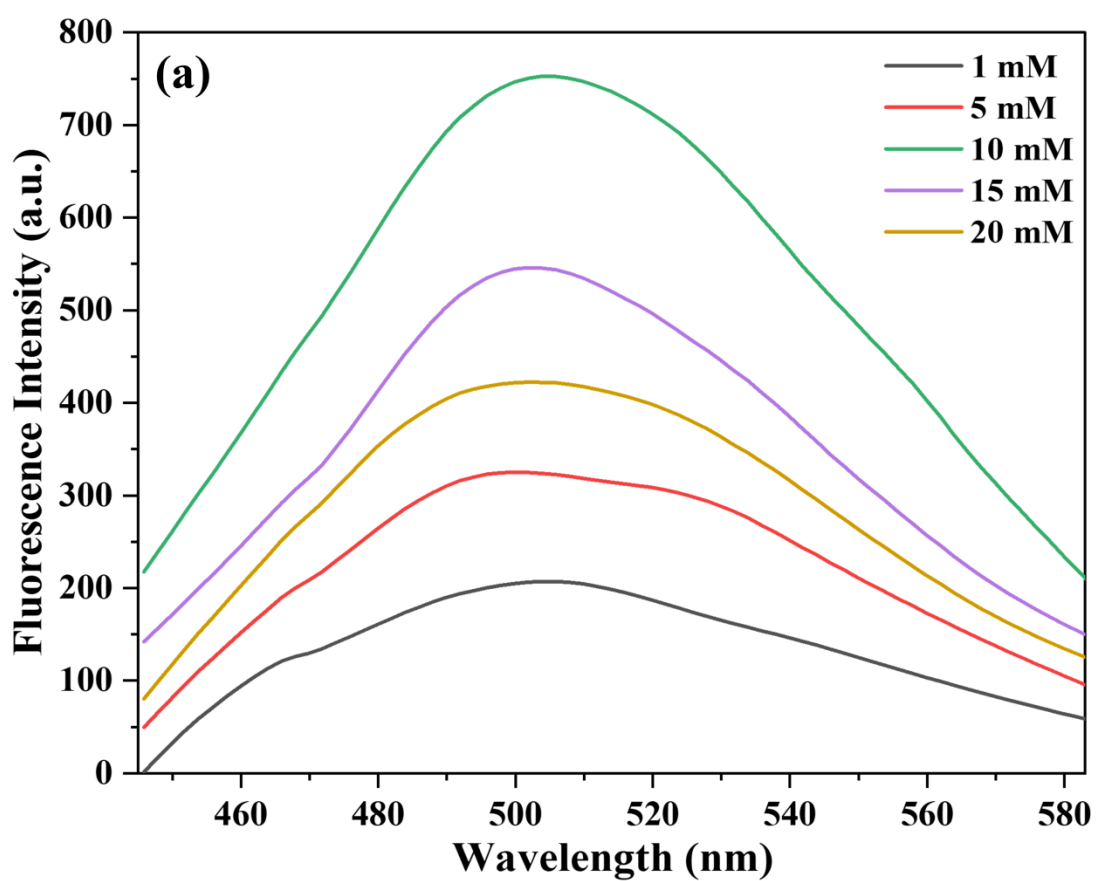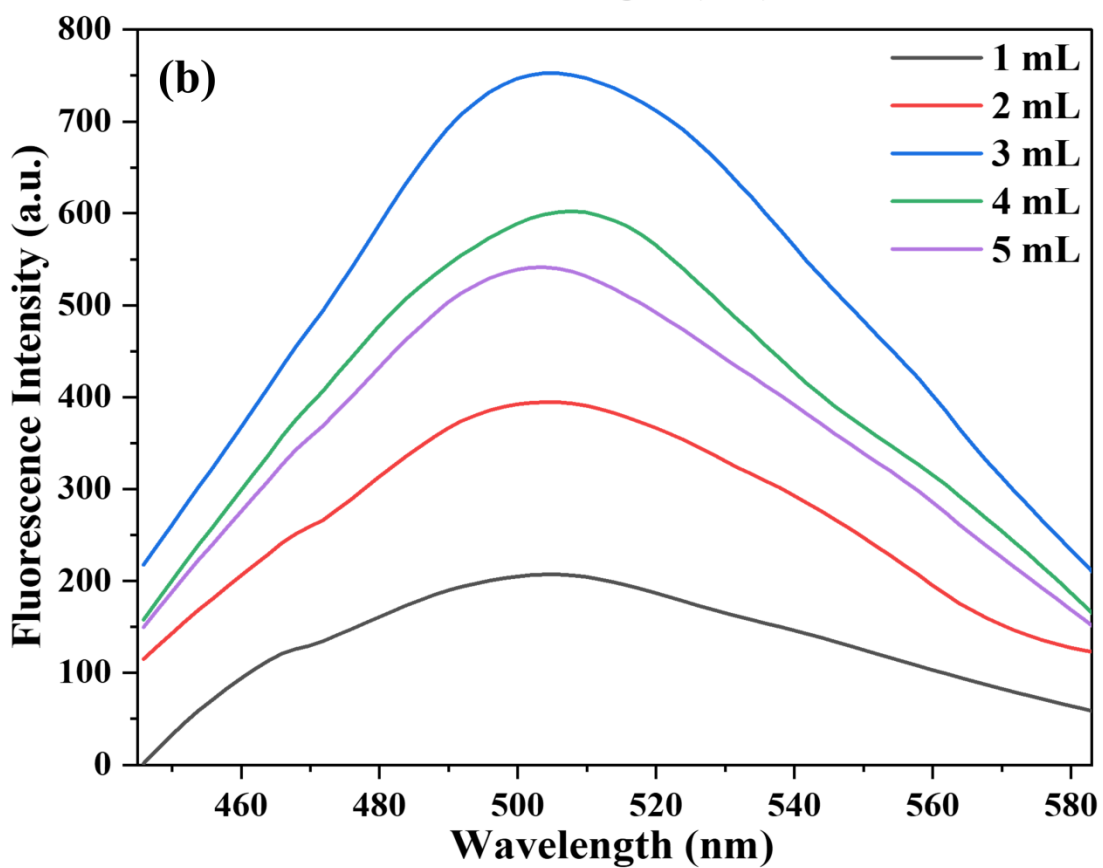

**Figure S1.** Emission spectra study of *V. negundo*-MoNCs at various (a) concentrations of MoCl<sub>5</sub> (1 mM-20 mM), (b) volumes of *V. negundo* extract from 1 mL to 5 mL.

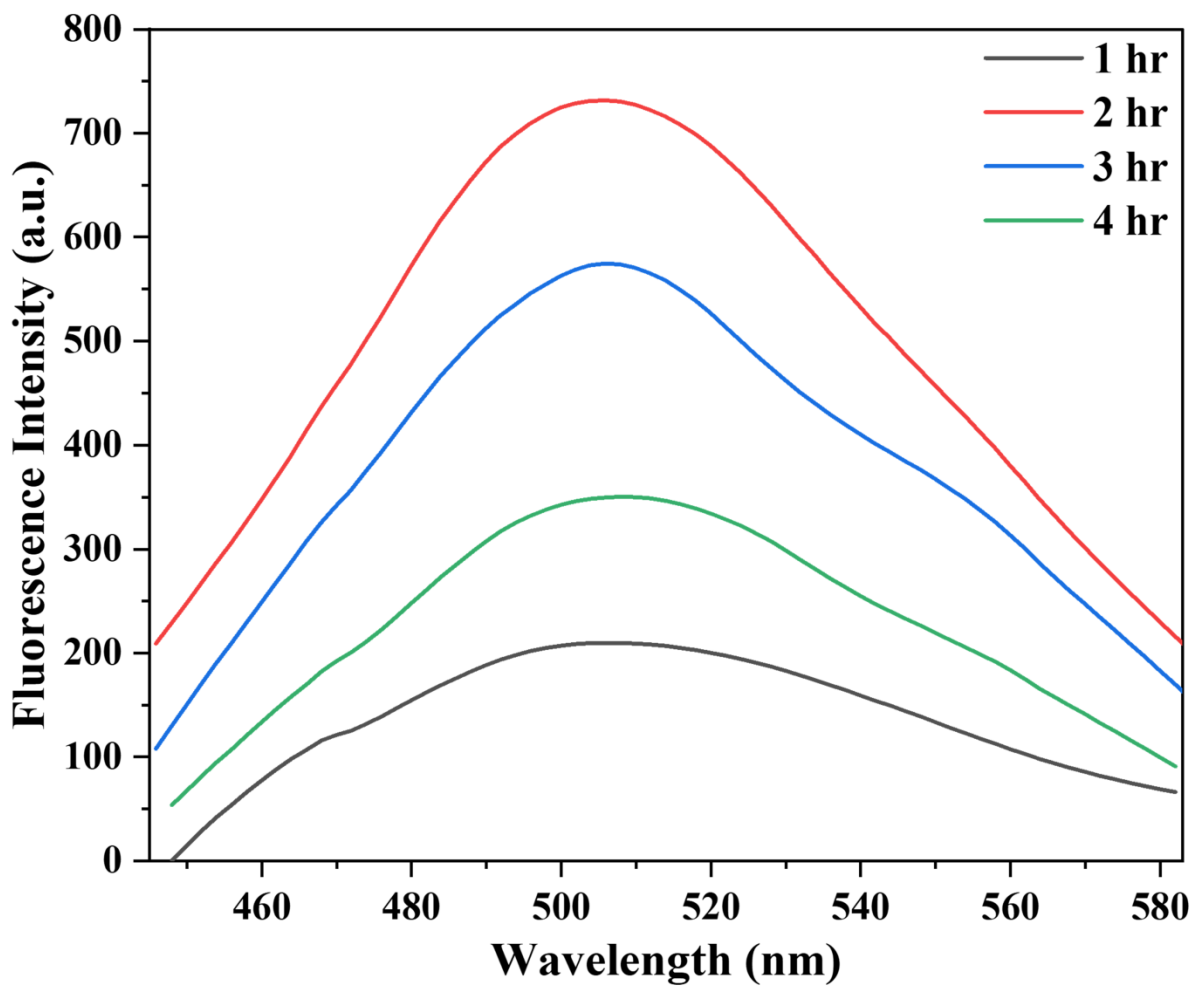

**Figure S2.** Fluorescence spectra of *V. negundo*-MoNCs at various reaction times (1 hr-4 hr).

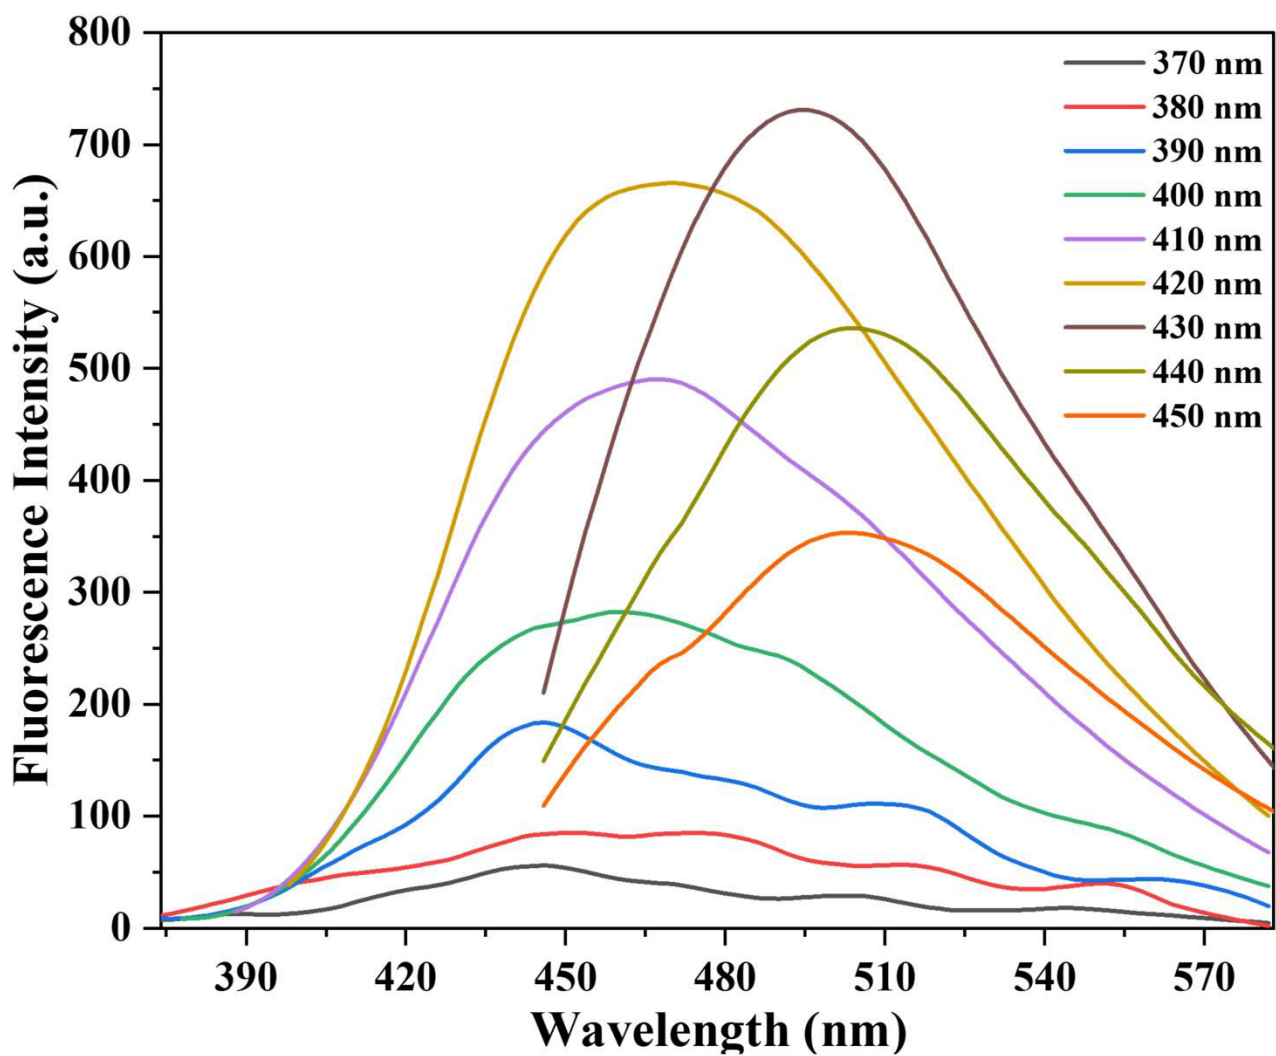

**Figure S3.** Excitation dependent emission spectra of *V. negundo*-MoNCs at different excitation wavelengths from 370-450 nm.

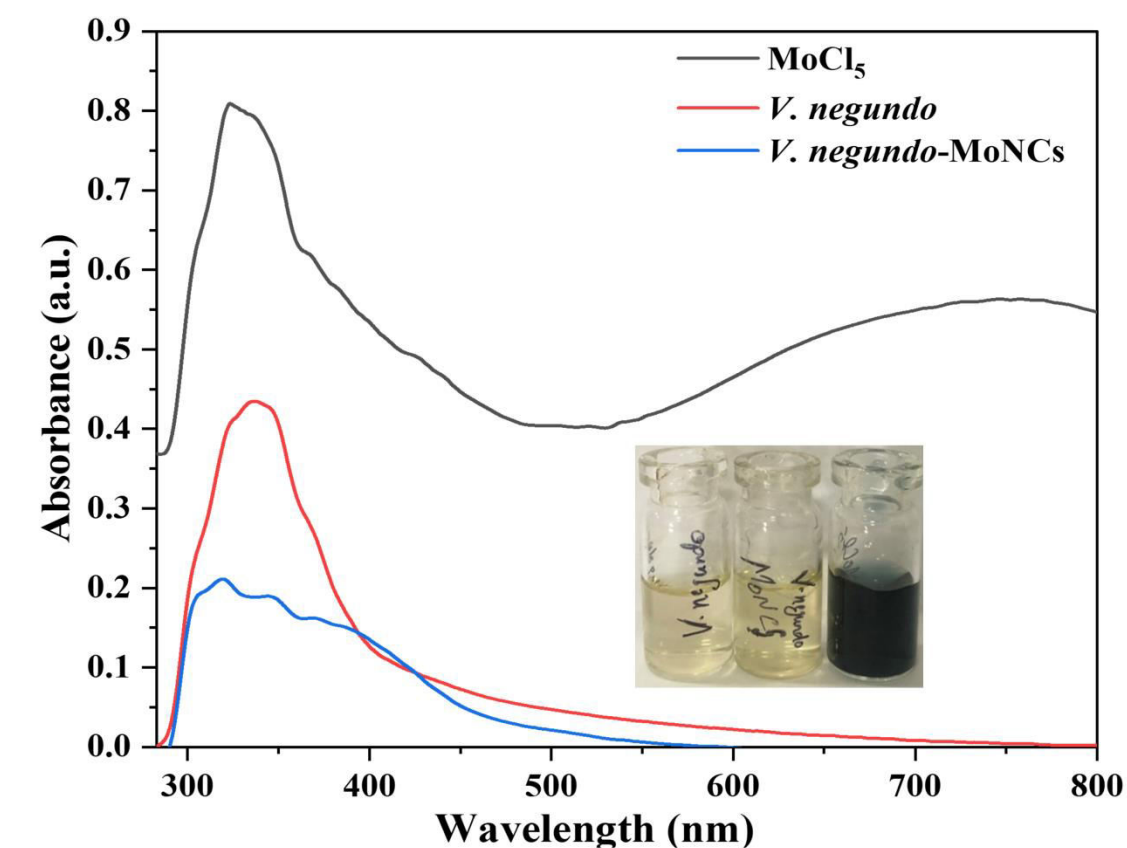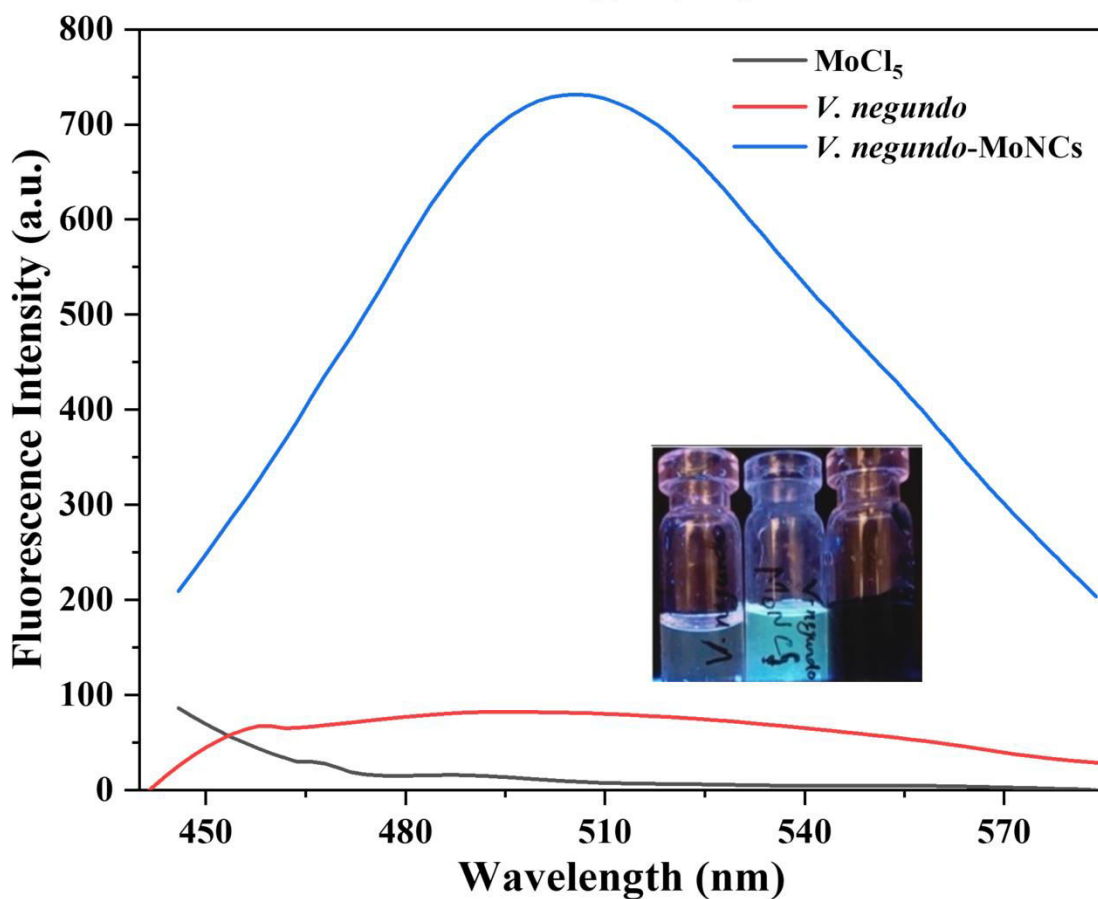

**Figure S4.** (a) Absorption spectra of  $\text{MoCl}_5$ , *V. negundo*, *V. negundo*-MoNCs, (b) Fluorescence emission spectra of  $\text{MoCl}_5$ , *V. negundo*, *V. negundo*-MoNCs. Inset: photographic images of corresponding solutions under UV light.

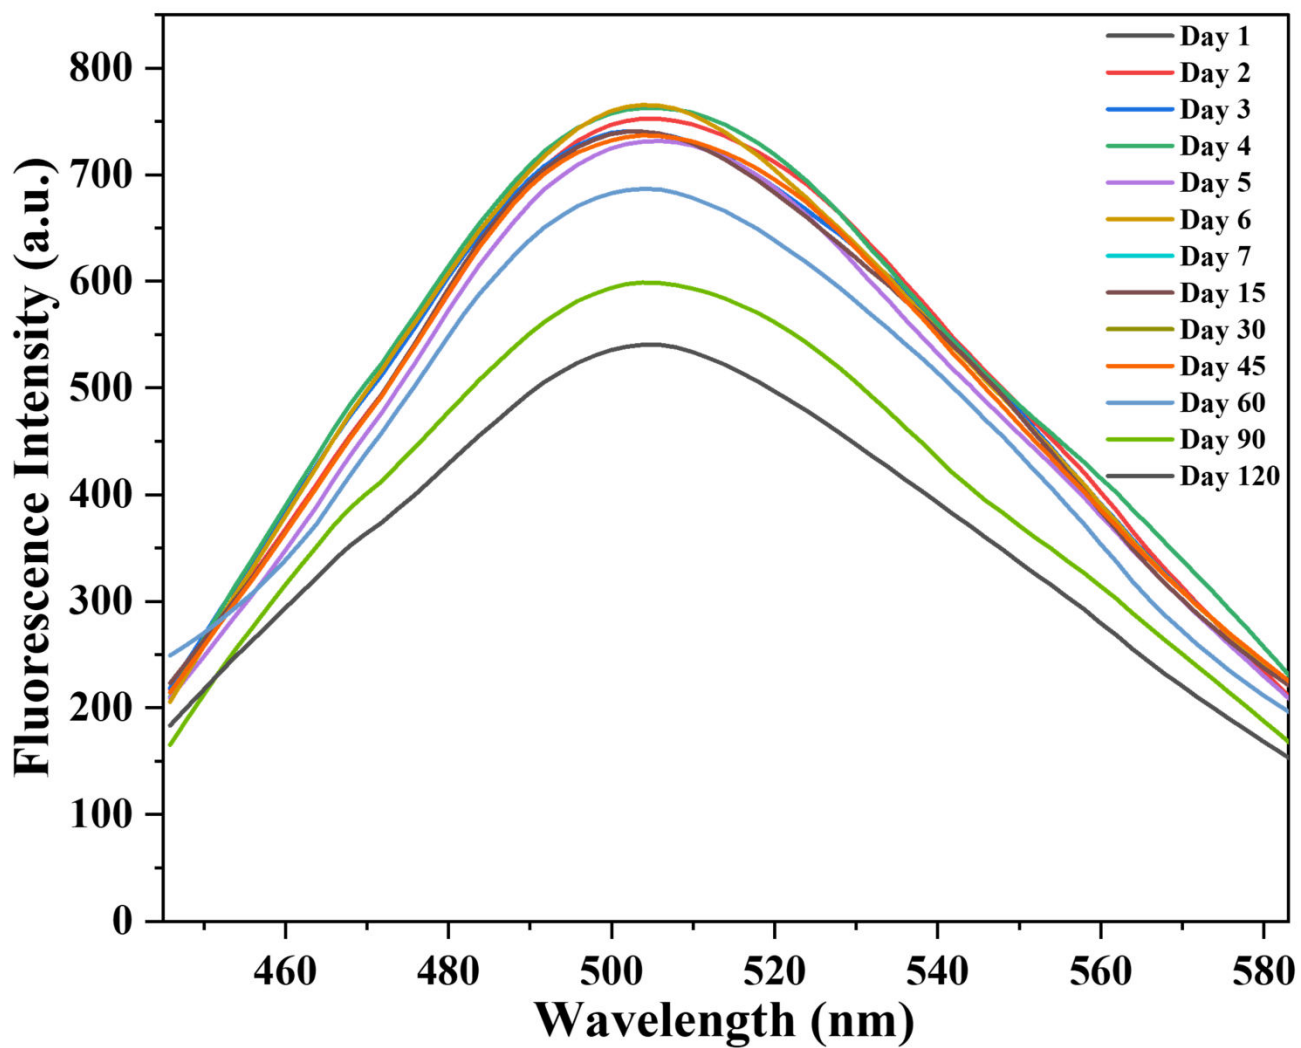

Figure S5. Evaluation of *V. negundo*-MoNCs stability from day 1 to day 120.

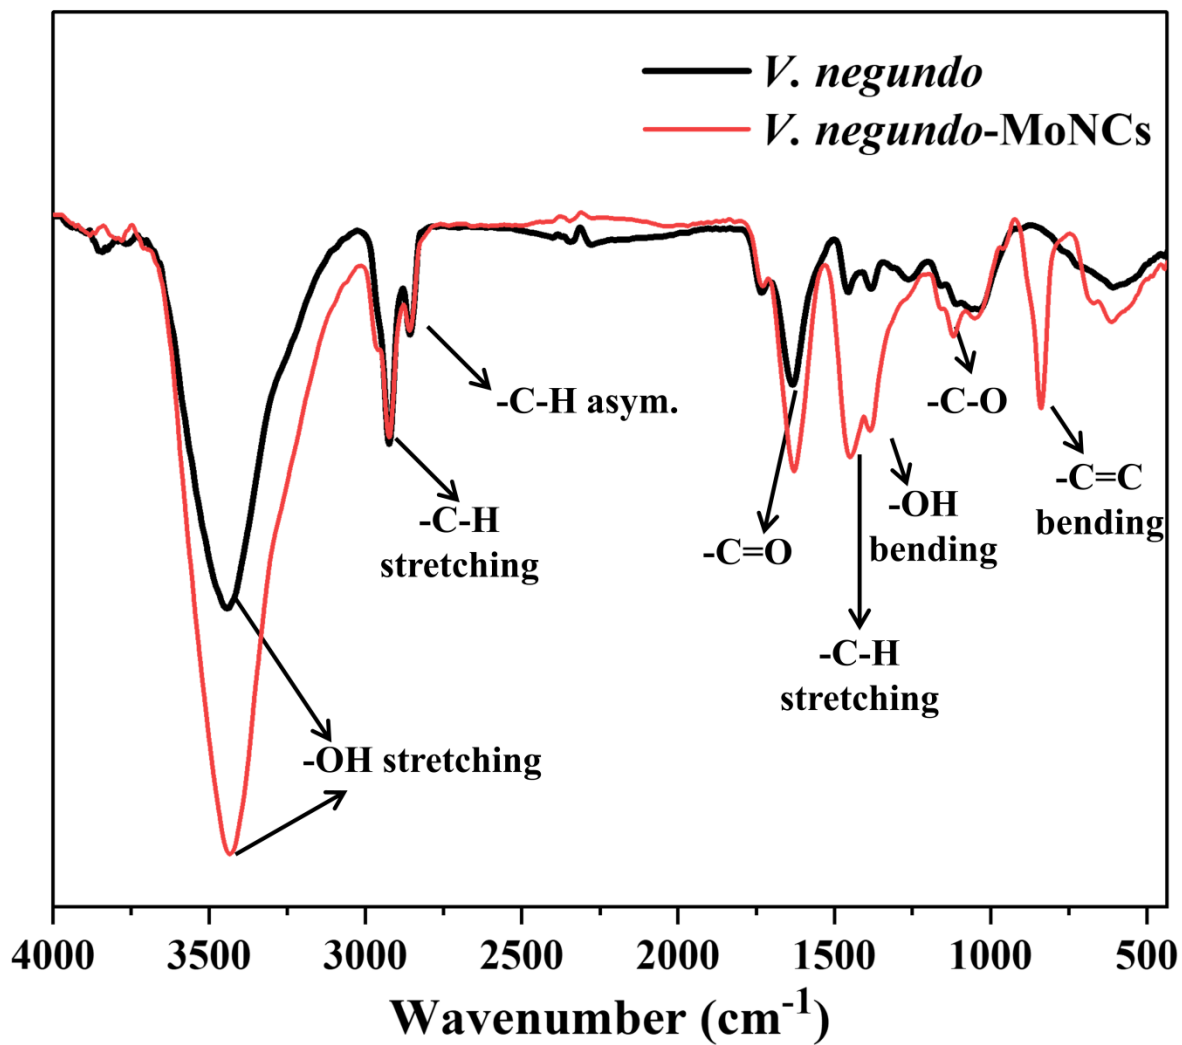

**Figure S6.** FTIR characterization of *V. negundo* and *V. negundo*-MoNCs.

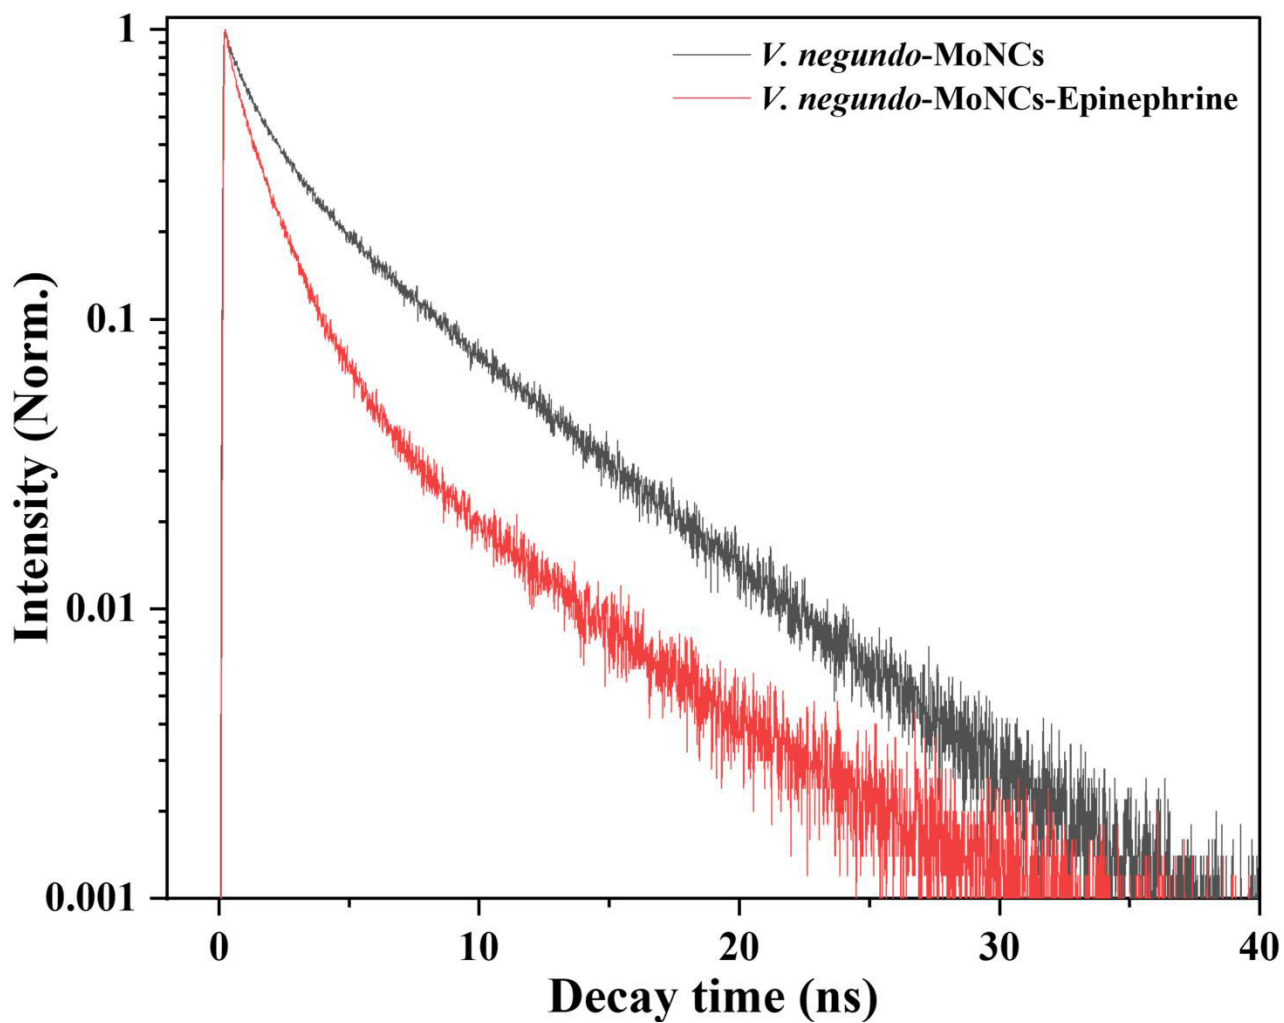

**Figure S7.** Fluorescence lifetime analysis of *V. negundo*-MoNCs and *V. negundo*-MoNCs with epinephrine.



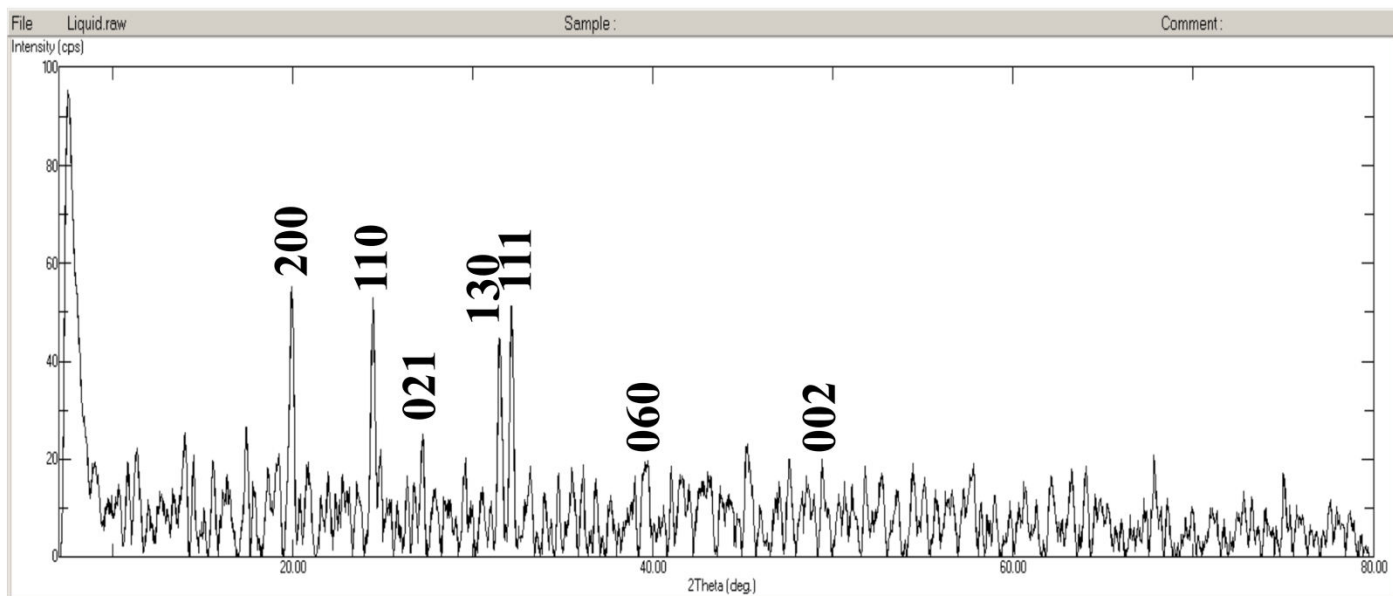

**Figure S8.** XRD pattern of *V. negundo*-MoNCs.

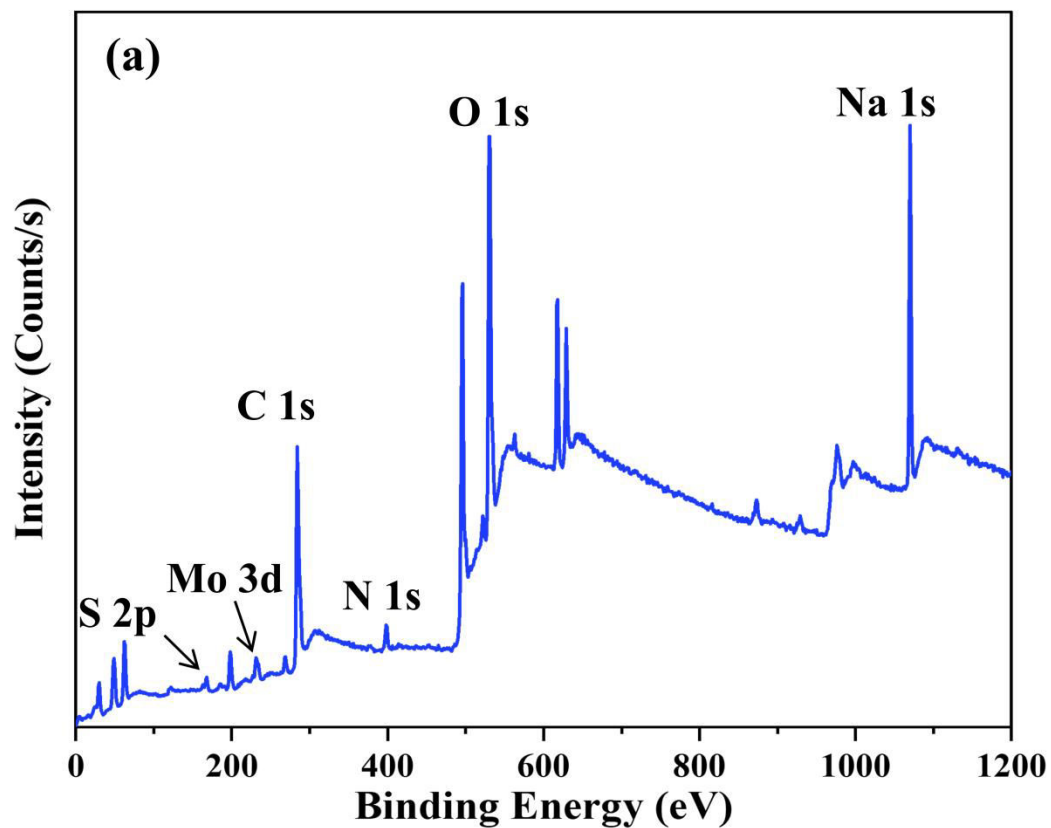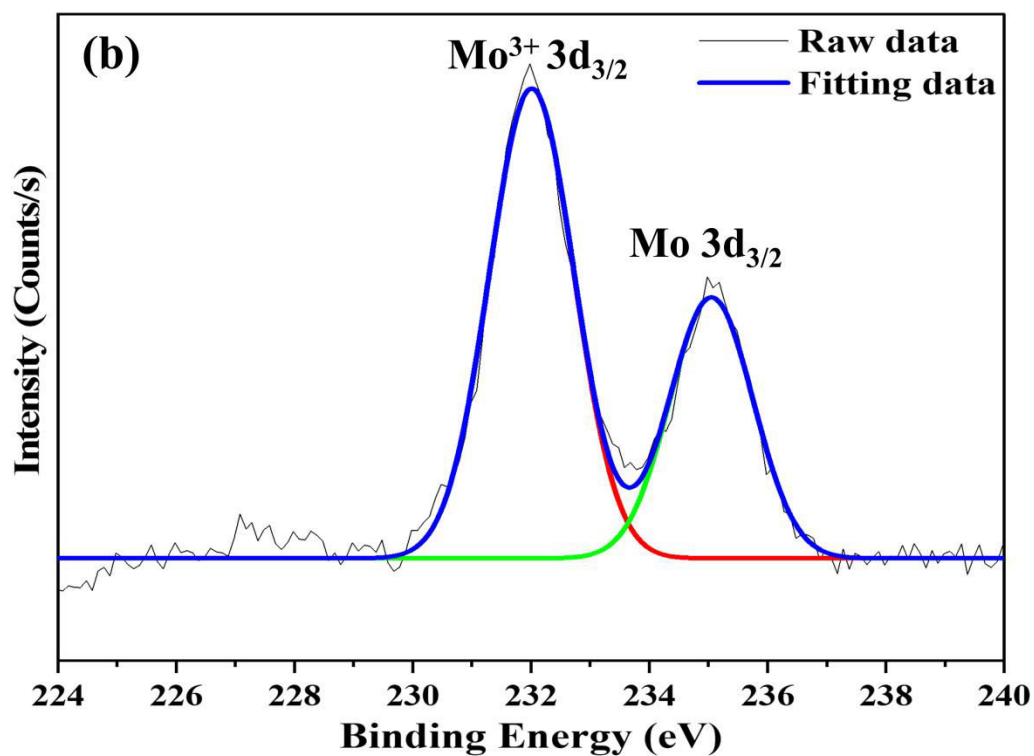

**Figure S9.** (a) XPS survey spectra of *V. negundo*-MoNCs and (b) XPS fitting spectra of Mo 3d showing two oxidation states of Mo in *V. negundo*-MoNCs.

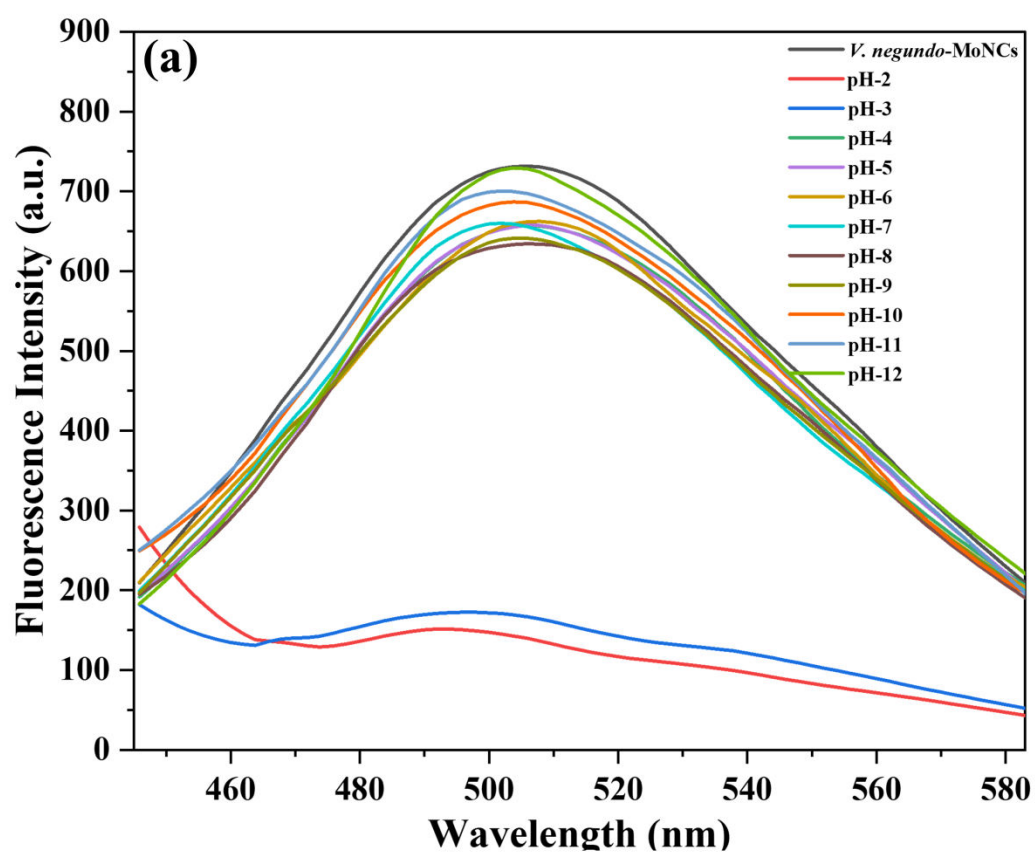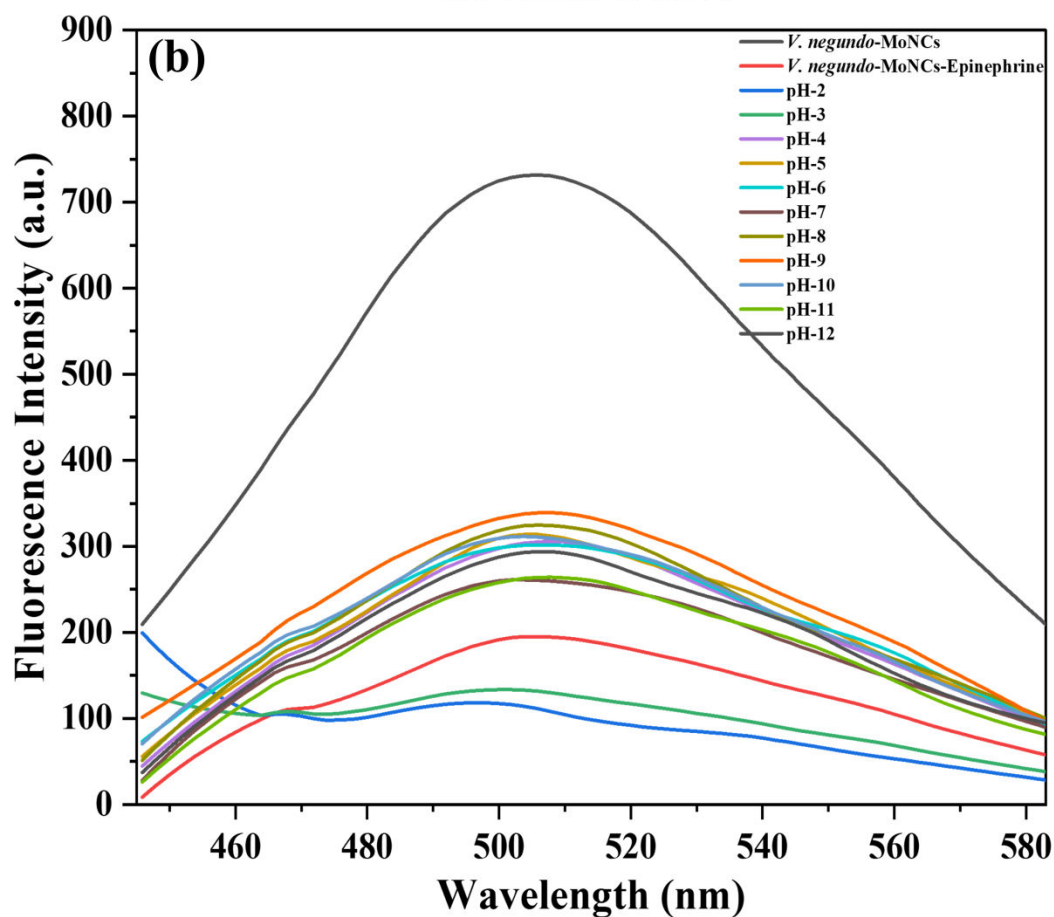

**Figure S10.** (a) PBS pH (2.0 to 12.0) effect on fluorescence spectra of *V. negundo*-MoNCs (b) and *V. negundo*-MoNCs with epinephrine.

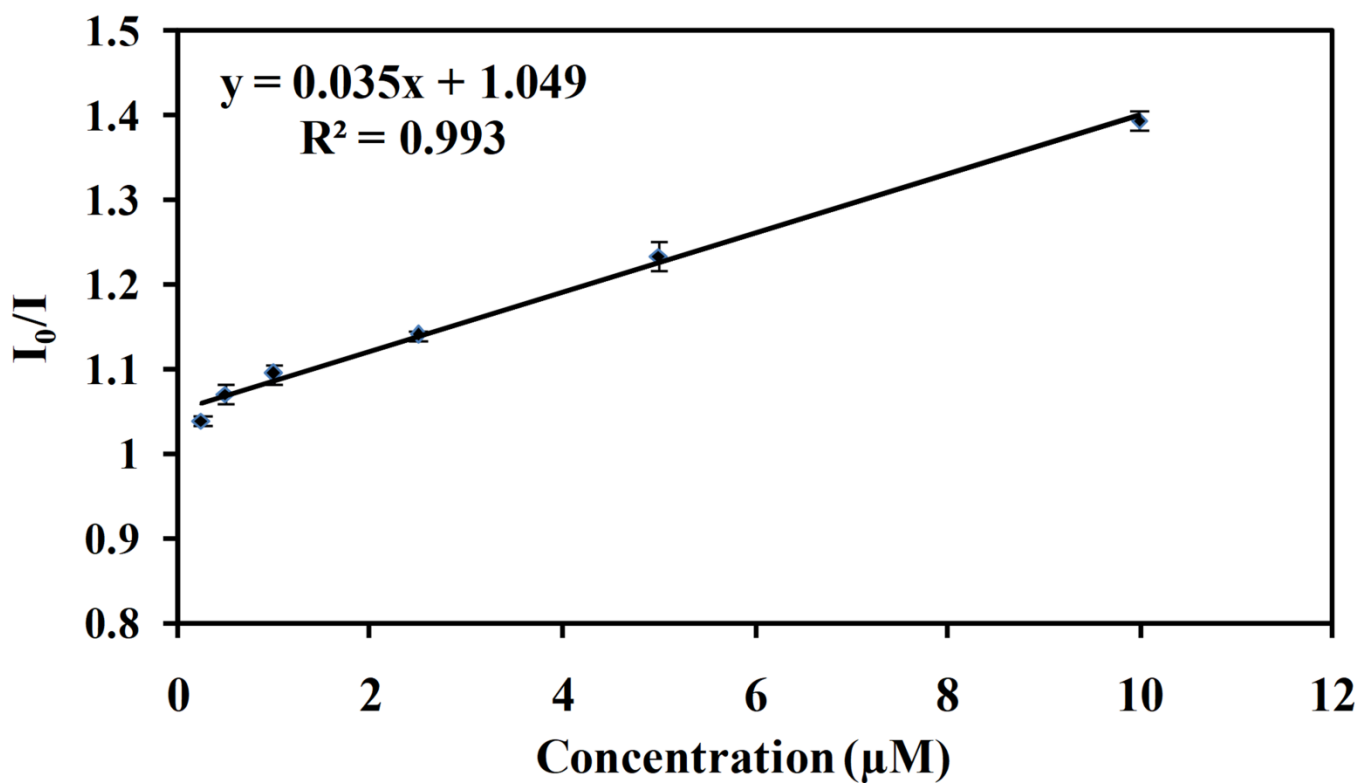

**Figure S11.** Calibration curve plotted between  $I_0/I$  ratio of *V. negundo*-MoNCs at 495 nm with concentration of epinephrine increasing in range of 0.25-10 μM.

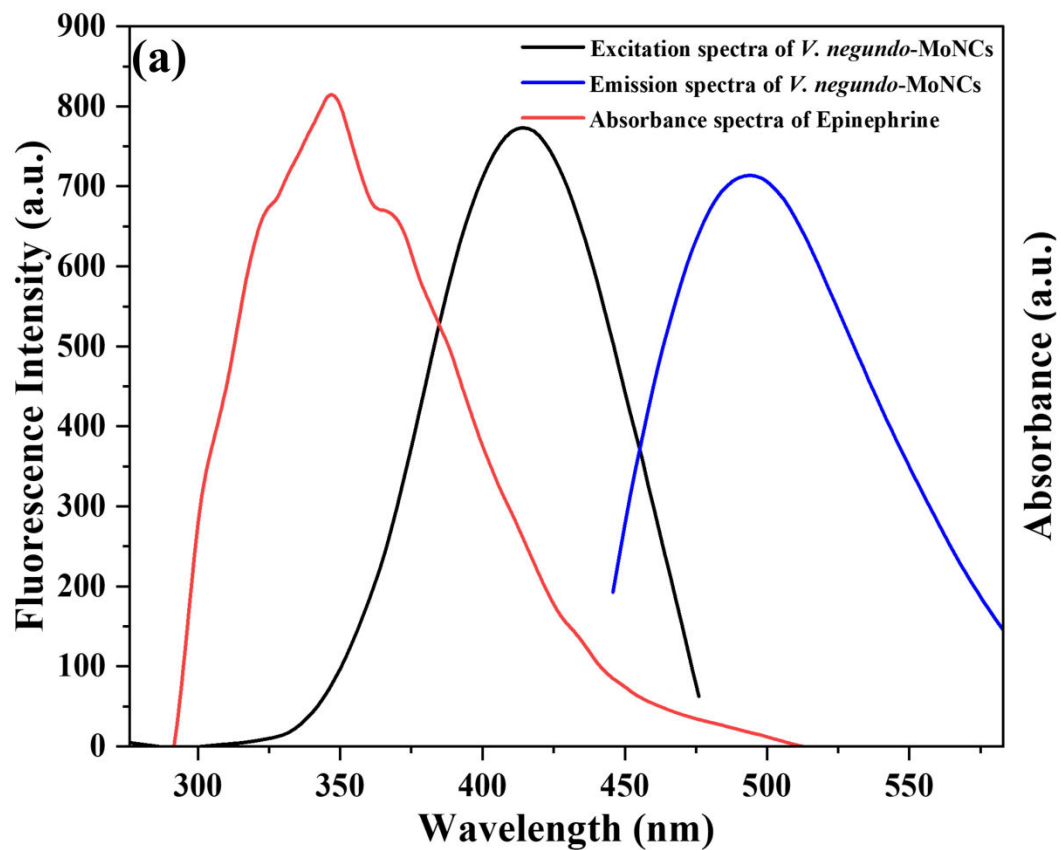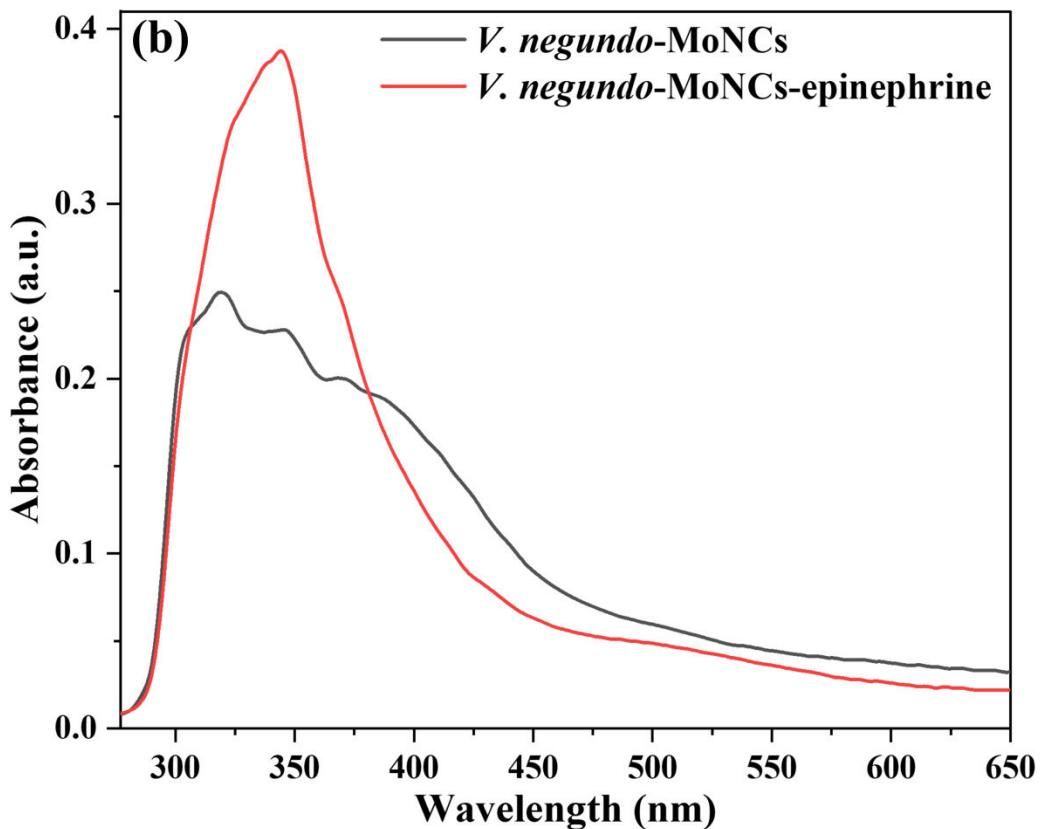

**Figure S12.** (a) Fluorescence excitation and emission spectra of *V. negundo*-MoNCs and absorbance spectra of epinephrine, (b) Absorbance spectrum of *V. negundo*-MoNCs and *V. negundo*-MoNCs-epinephrine.

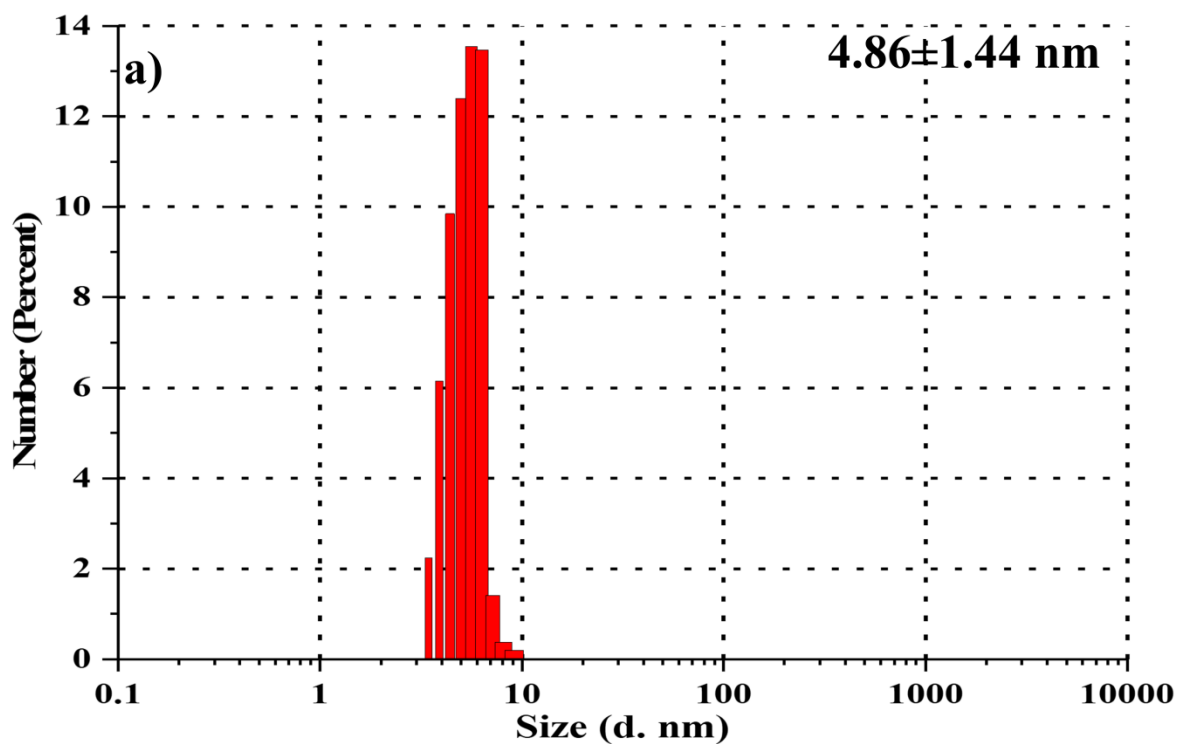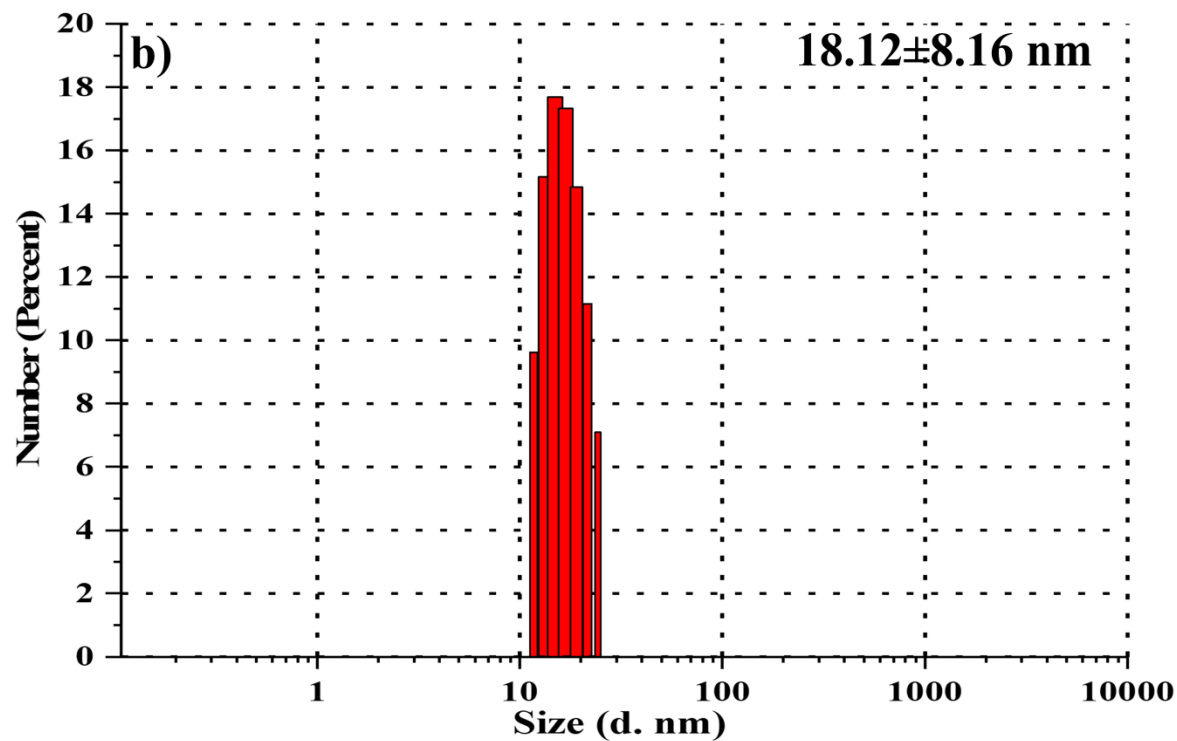

Figure S13. DLS of a) *V. negundo*-MoNCs b) *V. negundo*-MoNCs with epinephrine.

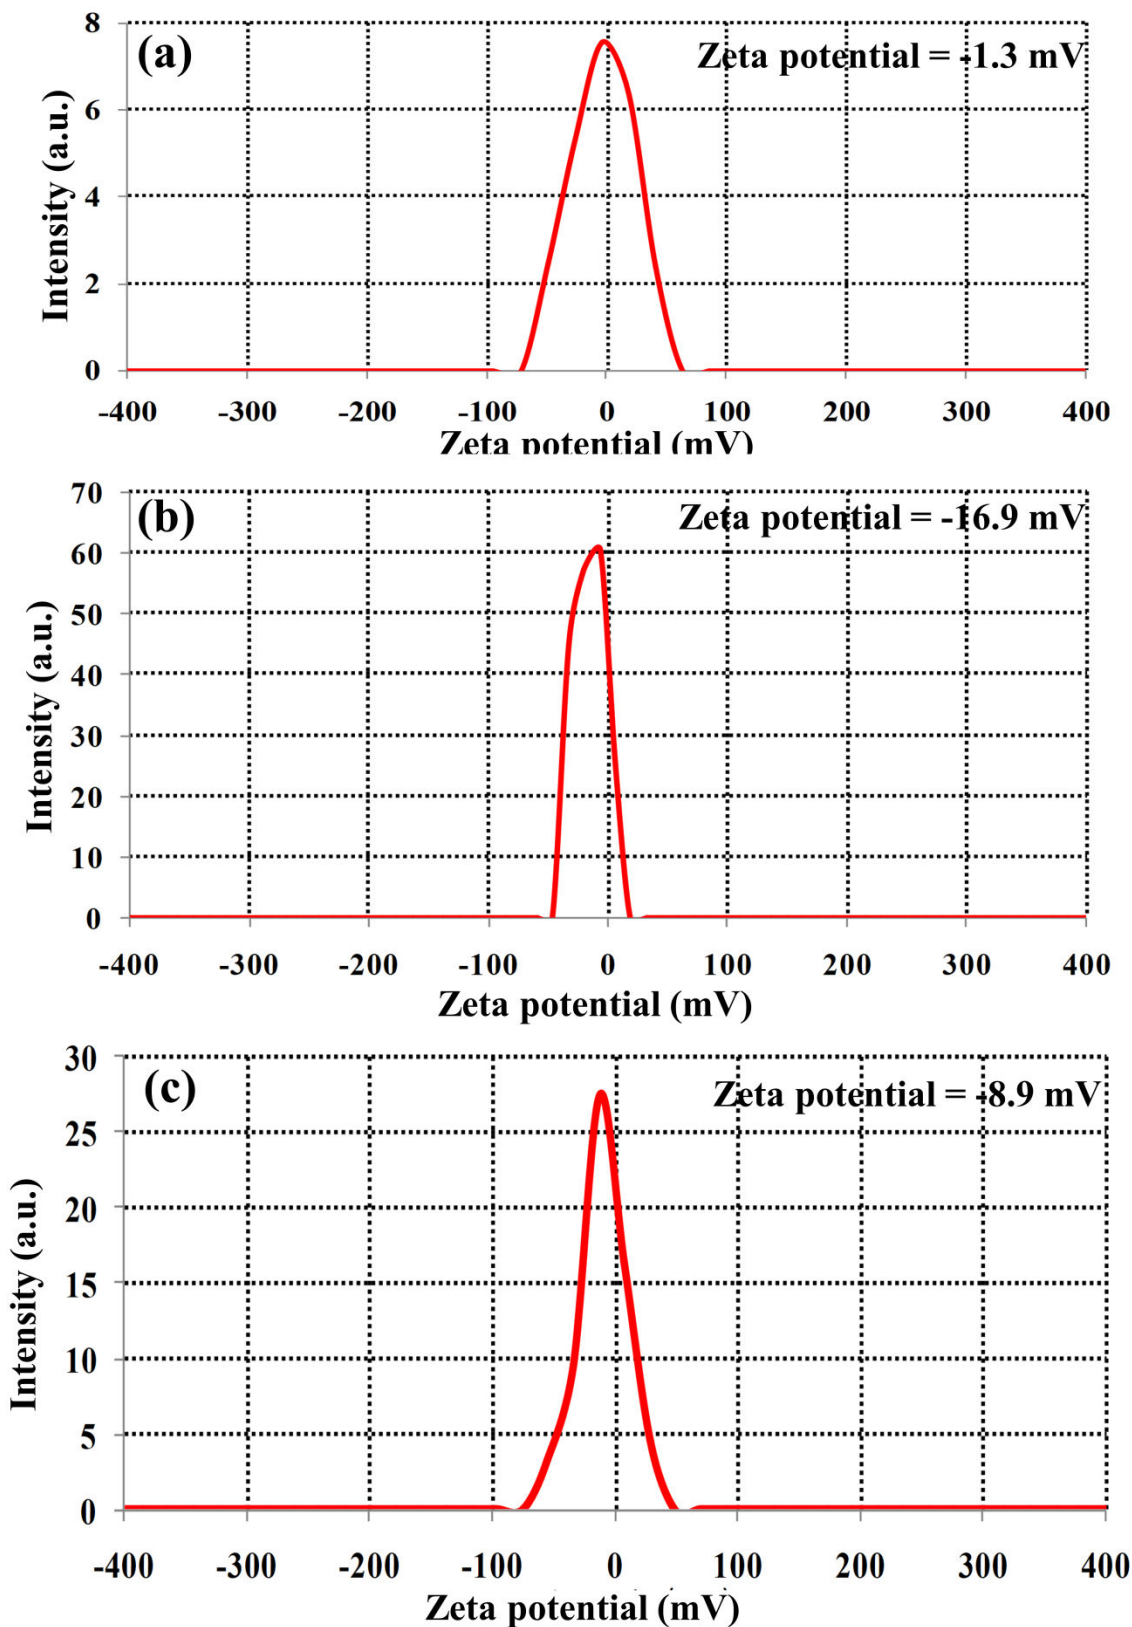

**Figure S14.** Zeta potential of a) Epinephrine b) *V. negundo*-MoNCs and c) *V. negundo*-MoNCs with epinephrine.

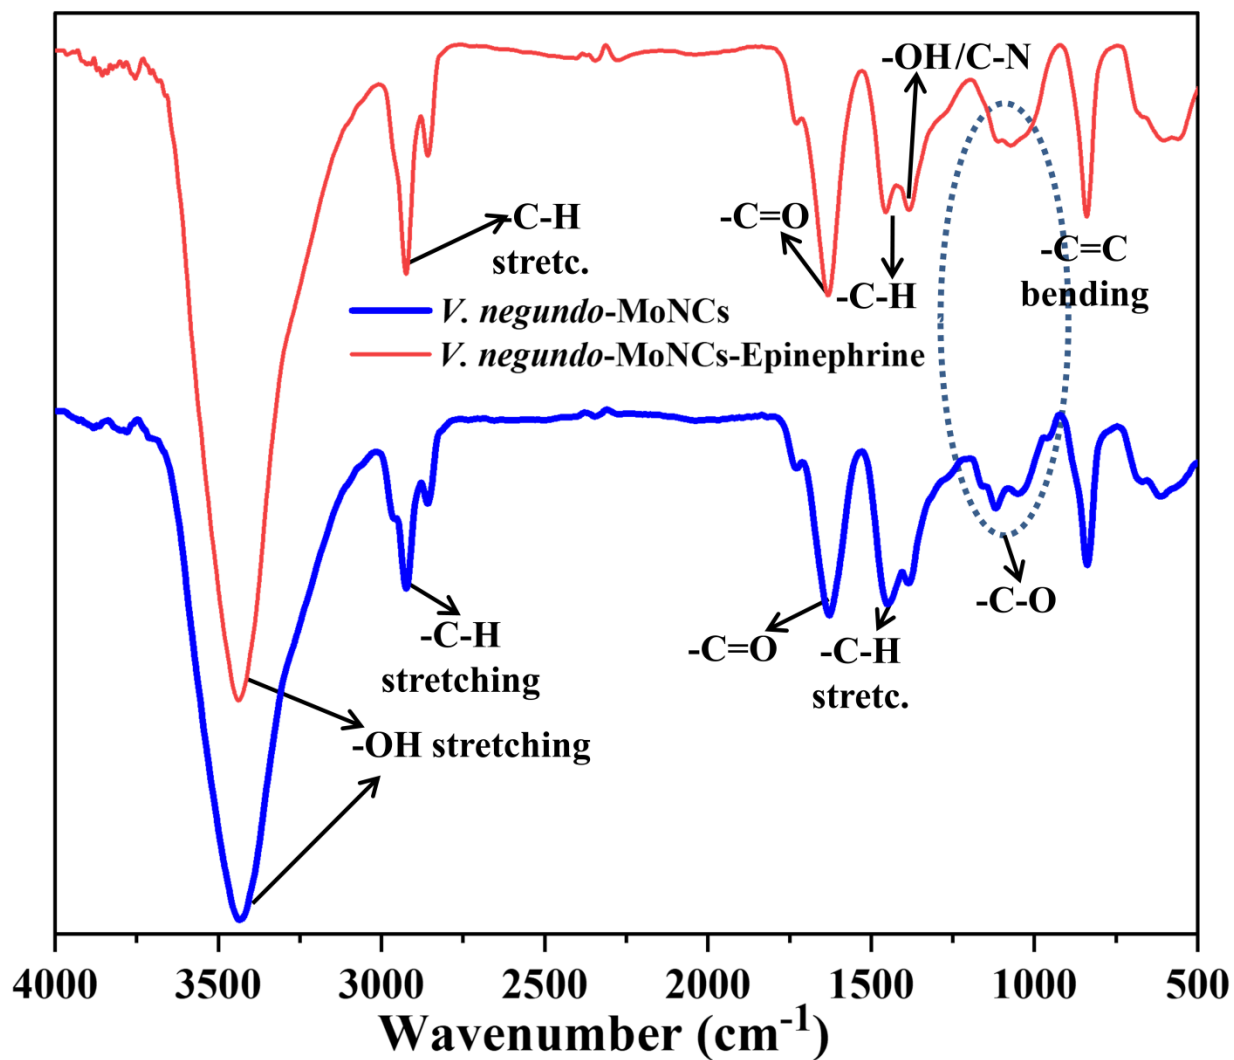

**Figure S15.** FTIR characterization of *V. negundo*-MoNCs and *V. negundo*-MoNCs with epinephrine.



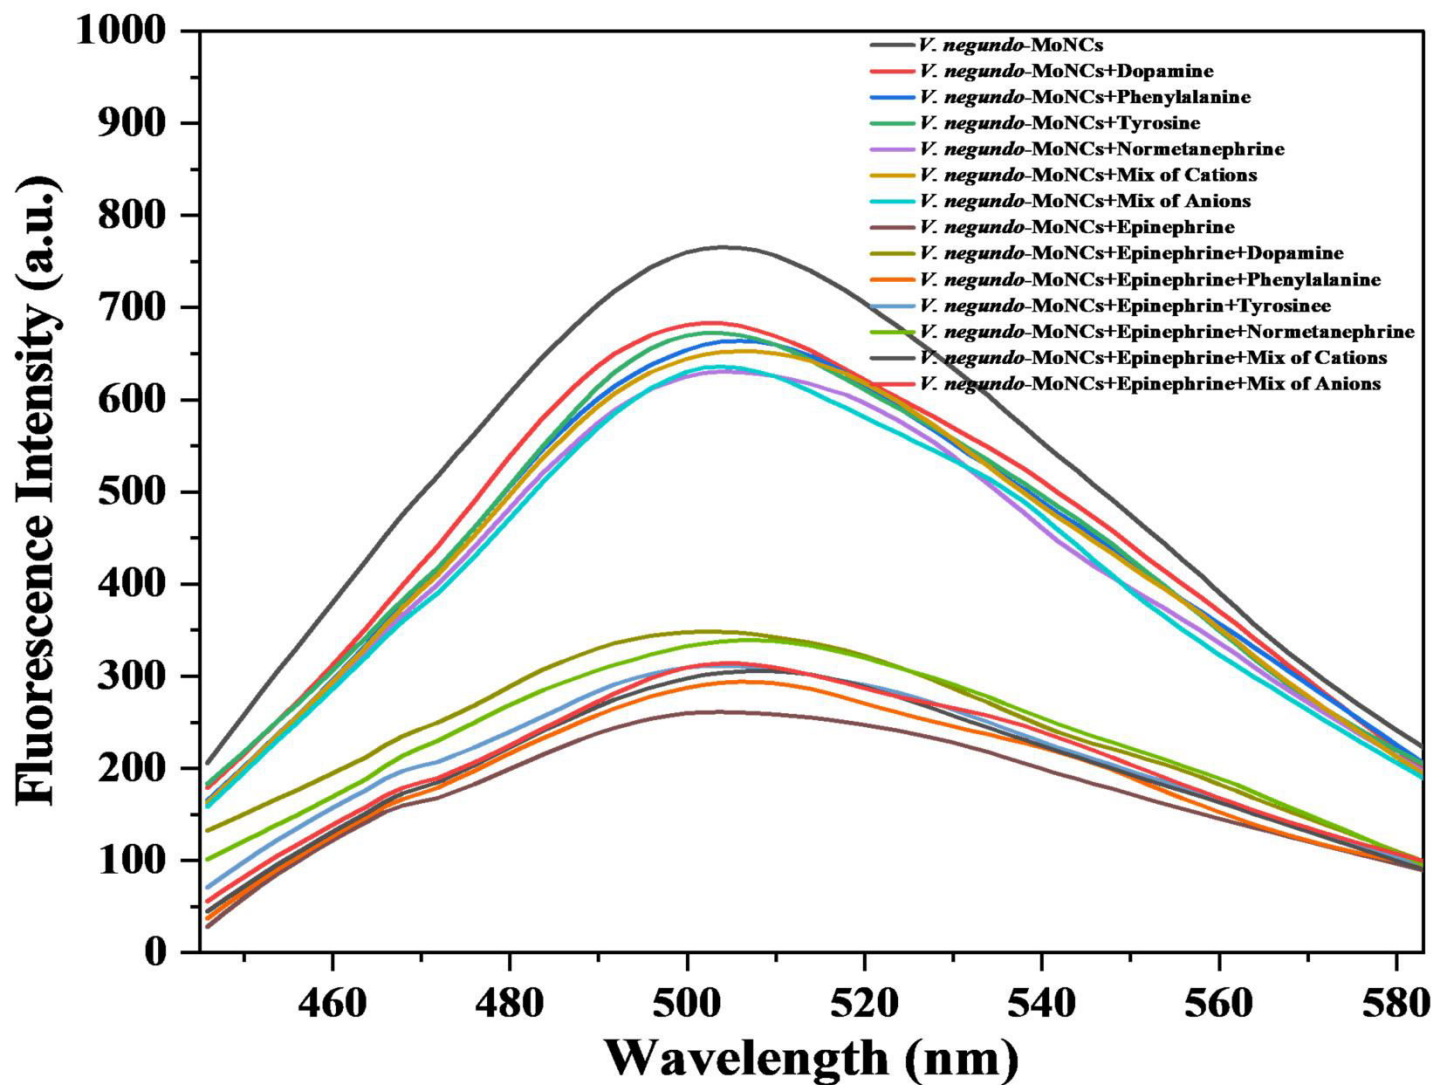

**Figure S16.** Interference study of *V. negundo*-MoNCs with various biomarkers (dopamine, phenylalanine, tyrosine, normetanephrine), cations and anions in presence of epinephrine.

**Table S1.** Analysis of epinephrine in pharmaceutical sample by using *V. negundo*-MoNCs as a probe.

| <b>Biomarker</b> | <b>Sample</b>        | <b>Added concentration (<math>\mu\text{M}</math>)</b> | <b>Found concentration (<math>\mu\text{M}</math>)</b> | <b>Recovery (%)</b> | <b>RSD (%)</b> |
|------------------|----------------------|-------------------------------------------------------|-------------------------------------------------------|---------------------|----------------|
| Epinephrine      | Adrenaline injection | 100                                                   | 98.54                                                 | 98.54               | 1.38           |
|                  |                      | 250                                                   | 246.83                                                | 98.73               | 1.23           |
|                  |                      | 500                                                   | 497.05                                                | 99.41               | 1.58           |
